# Supplementary material
Source: Royal Society of Chemistry journal article supplement (doi:10.1039/d6ta03207a)
Supplement: d6ta03207a1.pdf [file d6ta03207a1.pdf]

## Designing Organic Cathodes for Aqueous Zinc Batteries: Materials Chemistry of Carrier Selectivity, Mechanistic Validation, and Practical Benchmarking

Vipada Aupama<sup>1</sup>, Wathanyu Kao-ian<sup>2</sup>, Mohan Gopalakrishnan<sup>2</sup>, Jun Huang<sup>3</sup>, Jingwen Weng<sup>4</sup>, Yuki Nagao<sup>2,5</sup>, Soorathep Kheawhom<sup>2,6,\*</sup>

<sup>1</sup>Department of Chemical Technology, Faculty of Science, Chulalongkorn University, Bangkok 10330, Thailand

<sup>2</sup>Department of Chemical Engineering, Faculty of Engineering, Chulalongkorn University, Bangkok 10330, Thailand

<sup>3</sup>School of Chemical and Biomolecular Engineering, Sydney Nano Institute, The University of Sydney, Sydney, NSW 2037, Australia

<sup>4</sup>Department of Materials, Imperial College London, London SW7 2AZ, United Kingdom

<sup>5</sup>School of Materials Science, Japan Advanced Institute of Science and Technology, Nomi, Ishikawa 923-1292, Japan

<sup>6</sup>Center of Excellence on Advanced Materials for Energy Storage, Chulalongkorn University, Bangkok 10330, Thailand

\*Corresponding author: Soorathep.k@chula.ac.th

### Content

**Table S1.** Working terminology, scope boundaries, and carrier-identity tags used throughout this review.

**Table S2.** Operational descriptor framework for selective storage in organic aqueous zinc cathodes, including measurable or computable parameters, practical experimental proxies, representative host systems, and interpretive use.

**Table S3.** Semi-quantitative ranges and representative values for descriptors in the operational framework. Ranges are indicative and aggregated from heterogeneous primary literature; they are intended for comparative interpretation, not absolute prediction. Where ranges are sparse, this is itself highlighted as a literature gap.

**Table S1.** Working terminology, scope boundaries, and carrier-identity tags used throughout this review.

| <b>Term</b>                                      | <b>Working definition in this review</b>                                                                                                                                     | <b>Mechanistic significance/ scope note</b>                                                                                            |
|--------------------------------------------------|------------------------------------------------------------------------------------------------------------------------------------------------------------------------------|----------------------------------------------------------------------------------------------------------------------------------------|
| <b>Organic cathode host</b>                      | The redox-active organic phase that provides chemically defined storage sites in an aqueous zinc battery                                                                     | The organic component must be mechanistically central to charge storage, not merely a conductive additive, binder, or passive scaffold |
| <b>Redox site</b>                                | The atom or functional group whose electronic state changes during charge/discharge                                                                                          | Redox site and coordination site may coincide, but they need not be identical                                                          |
| <b>Coordination site</b>                         | The atom or local donor environment that directly interacts with the incoming ionic carrier                                                                                  | Determines whether $Zn^{2+}$ coordination is chemically plausible and how strongly the host can compete with proton-coupled pathways   |
| <b>Confinement environment</b>                   | The local steric, electrostatic, and solvation landscape around the active site, including pore size, interlayer spacing, nearby donor groups, and hydrogen-bonding networks | Controls accessibility, partial desolvation, and the balance between $Zn^{2+}$ - and $H^+$ -coupled storage                            |
| <b>Carrier identity</b>                          | The dominant ionic species compensating electronic charge during cycling                                                                                                     | Assigned here as $Zn^{2+}$ -dominant, $H^+$ -dominant, mixed, <b>or</b> unresolved                                                     |
| <b>Partially desolvated <math>Zn^{2+}</math></b> | A $Zn^{2+}$ species that retains part of its hydration shell while forming direct interactions with the host                                                                 | More realistic than assuming complete dehydration before coordination in aqueous media                                                 |
| <b><math>Zn^{2+}</math>-dominant storage</b>     | Storage in which $Zn^{2+}$ is the principal charge-compensating species under the stated conditions                                                                          | Requires evidence that excludes a mainly proton-driven mechanism                                                                       |
| <b><math>H^+</math>-dominant storage</b>         | Storage in which protonation or proton-coupled electron transfer provides most of the reversible charge compensation                                                         | Often associated with strong proton accessibility, hydrogen-bond networks, or local pH effects                                         |
| <b>Mixed storage</b>                             | Storage in which both $Zn^{2+}$ and $H^+$ contribute measurably, with relative contributions depending on electrolyte, rate, or potential window                             | Common in aqueous systems and should be treated as a mechanistic outcome rather than a classification failure                          |

| <b>Term</b>                                  | <b>Working definition in this review</b>                                                                                                                                                                  | <b>Mechanistic significance/ scope note</b>                                                |
|----------------------------------------------|-----------------------------------------------------------------------------------------------------------------------------------------------------------------------------------------------------------|--------------------------------------------------------------------------------------------|
| <b>Unresolved</b>                            | Cases where the available evidence is insufficient to assign a dominant carrier confidently                                                                                                               | Used when electrochemical or ex situ observations are suggestive but not definitive        |
| <b>Host-electrolyte-protocol combination</b> | The specific combination of host chemistry, electrolyte composition, and testing conditions under which carrier identity is evaluated                                                                     | Carrier assignment is not treated here as a fixed intrinsic property of the host alone     |
| <b>Fully organic host</b>                    | A molecular, polymeric, or framework-based cathode in which the organic phase is the primary redox-active component                                                                                       | Included within the scope of this review                                                   |
| <b>Hybrid / organometallic boundary case</b> | A system containing both organic and inorganic or metal-centered components                                                                                                                               | Included only when the organic component remains mechanistically central to charge storage |
| <b>Excluded systems</b>                      | Systems in which the dominant redox chemistry occurs on an inorganic framework, and the organic component serves only as a conductive additive, structural support, binder, or otherwise passive modifier | Outside the scope of this review                                                           |

**Table S2.** Operational descriptor framework for selective storage in organic aqueous zinc cathodes, including measurable or computable parameters, practical experimental proxies, representative host systems, and interpretive use.

| Descriptor domain                            | Operational parameter                                                                                                          | Practical computational proxy                                                                                                                                 | experimental/ Representative examples                                                                        | host Interpretive review                                                                                                                                                       | use in this Current maturity                                                  |
|----------------------------------------------|--------------------------------------------------------------------------------------------------------------------------------|---------------------------------------------------------------------------------------------------------------------------------------------------------------|--------------------------------------------------------------------------------------------------------------|--------------------------------------------------------------------------------------------------------------------------------------------------------------------------------|-------------------------------------------------------------------------------|
| <b>Electronic</b>                            | Zn <sup>2+</sup> binding energy at reduced site; redox-potential shift upon coordination; charge localization / redistribution | DFT-computed binding energies; CV/DPV potential shifts; FTIR/Raman/XPS changes in carbonyl, imine, or radical environments                                    | PBQS <sup>1</sup> ; PTO derivatives <sup>2</sup> ; HATN/HMHATN <sup>3</sup>                                  | Estimates whether Zn <sup>2+</sup> coordination is thermodynamically plausible relative to proton-coupled reduction; useful for comparing donor chemistry across host families | Readily computable / widely accessible                                        |
| <b>Geometric</b>                             | Donor-donor spacing; bite angle; chelation topology; planarity / distortion upon reduction                                     | DFT-optimized structures; crystallographic models; redox-state-dependent spectral changes consistent with structural rearrangement                            | TQD <sup>4</sup> (10.1039/D3TA01400B); TA-PTO-COF <sup>5</sup> (10.1039/D3SC07013A); BT-PTO <sup>6</sup> COF | Distinguishes whether a chemically plausible donor set is also structurally accessible for inner-sphere or cooperative Zn <sup>2+</sup> coordination                           | Computable, but less consistently reported                                    |
| <b>Hydrogen-bonding proton accessibility</b> | Protonation energy; /estimated pK <sub>a</sub> shift of reduced site; H-bond connectivity / lifetime                           | D <sub>2</sub> O isotope effects; buffer or pH dependence; in situ pH indicators; FTIR/Raman signatures of O-H or N-H formation; MD-derived H-bond statistics | HATN/HMHATN <sup>3</sup> ; TQD <sup>4</sup> ; PTO derivatives <sup>2</sup>                                   | Evaluates how readily H <sup>+</sup> can compete with Zn <sup>2+</sup> and whether mixed storage is chemically expected under aqueous conditions                               | Operationally accessible through proxies; quantitative treatment still uneven |
| <b>Confinement</b>                           | Pore aperture; pore size distribution; interlayer spacing; channel size;                                                       | Dry-state gas sorption/BET as an initial structural descriptor; XRD/SAXS; wet-state electrolyte                                                               | rPOP; BT-PTO COF <sup>6</sup> ; TfDa-COF <sup>8</sup>                                                        | Assesses whether the host can stabilize partially desolvated Zn <sup>2+</sup> through restricted                                                                               | Readily measurable in porous/framework systems, but wet-state                 |

| Descriptor domain                       | Operational parameter                                                                                                    | Practical computational proxy                                                                                                                           | experimental/ Representative examples                                                             | host Interpretive review                                                                                                                                                               | use in this Current maturity                                        |
|-----------------------------------------|--------------------------------------------------------------------------------------------------------------------------|---------------------------------------------------------------------------------------------------------------------------------------------------------|---------------------------------------------------------------------------------------------------|----------------------------------------------------------------------------------------------------------------------------------------------------------------------------------------|---------------------------------------------------------------------|
| <b>Transport</b>                        | wet-state ion accessibility; electrolyte uptake/swelling behavior                                                        | uptake <sup>7</sup> , swelling analysis, in situ SAXS/SANS, ion-accessible area estimates, and structural comparison of open versus confined analogues. |                                                                                                   | solvation and pre-organized donor environments                                                                                                                                         | accessibility is less consistently quantified                       |
|                                         | Zn <sup>2+</sup> diffusion coefficient; charge-transfer resistance; electronic conductivity; rate-dependent polarization | GITT/PITT; EIS; conductivity measurements; rate matched loading / voltage window                                                                        | PBQS <sup>1</sup> ; rPOP <sup>7</sup> ; PTEMPO-type cathode <sup>9</sup>                          | Tests whether the favored pathway remains observable at practical current density or becomes masked by faster proton or anion-coupled processes                                        | Readily measurable, but often not compared under matched conditions |
| <b>Descriptor-coupling systems view</b> | Co-variation of electronic, geometric, confinement, and transport terms                                                  | Cross-comparison of host series under matched electrolytes and loadings; qualitative high/moderate/low mapping across descriptor domains                | PBQS <sup>1</sup> ; HATN/HMHATN <sup>3</sup> ; TA-PTO-COF <sup>5</sup> ; PASP-TEMPO <sup>10</sup> | Prevents overinterpretation of any single descriptor and supports evidence-graded assignment of Zn <sup>2+</sup> -dominant, H <sup>+</sup> -dominant, mixed, or boundary-case behavior | Still developing; strongest when tied to controlled host series     |

**Note on confinement descriptors.** Dry-state porosity from gas sorption (e.g., N<sub>2</sub> BET) is a useful structural descriptor but is often a poor predictor of wet-state ion accessibility in aqueous organic cathodes. Electrolyte uptake, polymer swelling, pore wettability, and confinement-induced solvent restructuring can substantially modify the effective accessible volume during operation. Where confinement is invoked as a mechanistic advantage, dry-state BET should ideally be supplemented by wet-state probes such as electrolyte uptake measurements, in-situ SAXS or SANS, ion-permeable area estimates, or operando swelling characterization.

**Note on DFT descriptors.** Standard density functional theory (DFT) calculations of  $\text{Zn}^{2+}$  binding energies and related descriptors are sensitive to functional choice, treatment of aqueous solvation, and explicit modeling of confinement and electrolyte structure. GGA functionals routinely under- or over-estimate solvation contributions, and open-shell organic radicals require careful selection of functional and basis set. DFT-derived descriptors should therefore be read as plausibility indicators, ideally cross-validated against experimental observables (CV/DPV potentials, FTIR/Raman shifts, isotope effects), rather than as predictive carrier assignments. Continuum-plus-microsolvation treatments are preferred for aqueous descriptor work.

**Table S3.** Semi-quantitative ranges and representative values for descriptors in the operational framework. Ranges are indicative and aggregated from heterogeneous primary literature; they are intended for comparative interpretation, not absolute prediction. Where ranges are sparse, this is itself highlighted as a literature gap.

| Descriptor domain                       | Operational parameter                                                                                | Indicative range / typical reported magnitude                                                                                                                                                                                | Comparative interpretation in this review                                                                                                                                                            |
|-----------------------------------------|------------------------------------------------------------------------------------------------------|------------------------------------------------------------------------------------------------------------------------------------------------------------------------------------------------------------------------------|------------------------------------------------------------------------------------------------------------------------------------------------------------------------------------------------------|
| Electronic                              | DFT-computed Zn <sup>2+</sup> binding energy at reduced site (cluster / fragment level)              | Reported values typically span ~ -1 to -4 eV depending on coordination geometry, donor identity, and solvation model; values without explicit solvation often appear more negative.                                          | Useful for ranking thermodynamic plausibility within a single computational protocol; absolute values are not directly comparable across studies with different functionals or solvation treatments. |
| Electronic                              | Redox-potential shift on Zn-salt addition (CV / DPV)                                                 | Tens to hundreds of mV in many carbonyl- and N-rich systems; smaller in p-type radical systems where Zn <sup>2+</sup> is not the carrier.                                                                                    | Sensitive to electrolyte composition, IR drop, and reference-electrode choice; meaningful only when matched conditions are reported.                                                                 |
| Geometric                               | Donor-donor spacing in proposed coordination motif                                                   | Typically ~ 2.5–4.5 Å in chelating carbonyl/imine pockets; broader in COFs/MOFs depending on linker.                                                                                                                         | Comparable to Zn-O / Zn-N distances in molecular complexes (~ 2.0–2.2 Å); donor spacing close to twice this range supports cooperative coordination.                                                 |
| Hydrogen bonding / proton accessibility | Estimated pK <sub>a</sub> shift on reduction; D <sub>2</sub> O isotope effect on capacity / kinetics | ESI-derived pK <sub>a</sub> shifts of 1–3 units are commonly inferred for reduced quinone- or imine-type sites; D <sub>2</sub> O isotope effects on rate are typically 1.5–3× when H <sup>+</sup> transfer is rate-relevant. | Strongly suggestive of H <sup>+</sup> coupling when both indicators are aligned; absence of isotope effect is informative but does not exclude minor H <sup>+</sup> contributions.                   |
| Confinement                             | Pore aperture / interlayer spacing (BET, SAXS, XRD)                                                  | Pore apertures of ~ 1–3 nm in many COF/POP systems; layer spacings of ~ 0.3–1 nm in stacked frameworks.                                                                                                                      | Comparable to the size of solvated and partially desolvated Zn <sup>2+</sup> species (~ 0.3–0.6 nm); confinement claims should be paired with wet-state assessment (see BET note).                   |
| Transport                               | Apparent Zn <sup>2+</sup> chemical diffusion coefficient (GITT/PITT)                                 | Reported values range over several orders of magnitude (~ 10 <sup>-10</sup> -10 <sup>-8</sup> cm <sup>2</sup> s <sup>-1</sup> ) depending on host architecture and protocol.                                                 | Cross-study comparisons are limited by differing assumptions in GITT analysis; matched-protocol values are                                                                                           |

| Descriptor domain       | Operational parameter                                      | Indicative range / typical reported magnitude                                      | Comparative interpretation in this review                                                  |
|-------------------------|------------------------------------------------------------|------------------------------------------------------------------------------------|--------------------------------------------------------------------------------------------|
|                         |                                                            |                                                                                    | required for reliable benchmarking.                                                        |
| Coupling / systems view | Co-variation of descriptor scores under matched conditions | Quantitative coupling data sparse; most reports provide only qualitative coupling. | Highlighted as a research gap; controlled host series with matched electrolyte are needed. |

## References

- 1 G. Dawut, Y. Lu, L. Miao and J. Chen, *Inorg. Chem. Front.*, 2018, **5**, 1391–1396.
- 2 D. Wang, M. Qin, C. Zhang, M. Li, C. Peng, C. Zhi, Q. Li and L. Zhu, *Chem. Sci.*, 2025, **16**, 3630–3637.
- 3 G. Sun, B. Yang, X. Chen, Y. Wei, G. Yin, H. Zhang and Q. Liu, *Chem. Eng. J.*, 2022, **431**, 134253.
- 4 S. Menart, K. Pirnat, D. Pahovnik and R. Dominko, *J. Mater. Chem. A*, 2023, **11**, 10874–10882.
- 5 H. Li, M. Cao, Z. Fu, Q. Ma, L. Zhang, R. Wang, F. Liang, T. Zhou and C. Zhang, *Chem. Sci.*, 2024, **15**, 4341–4348.
- 6 S. Zheng, D. Shi, D. Yan, Q. Wang, T. Sun, T. Ma, L. Li, D. He, Z. Tao and J. Chen, *Angew. Chem. Int. Ed.*, 2022, **61**, e202117511.
- 7 O. Buyukcikir, R. Yuksel, F. Begar, M. Erdogmus, M. Arsakay, S. H. Lee, S. O. Kim and R. S. Ruoff, *ACS Appl. Energy Mater.*, 2023, **6**, 7672–7680.
- 8 L. Li, H. Yang, X. Wang, Y. Ma, W. Ou, H. Peng and G. Ma, *J. Mater. Chem. A*, 2023, **11**, 26221–26229.
- 9 N. S. W. Gamage, Y. Shi, C. J. Mudugamuwa, J. Santos-Peña, D. A. Lewis, J. M. Chalker and Z. Jia, *Energy Storage Mater.*, 2024, **72**, 103731.
- 10 Y. Deng, C. Teng, Y. Wu, K. Zhang and L. Yan, *ChemSusChem*, 2022, **15**, e202102710.
